# Supplementary material for: Cell Surface Fibroblast Activation Protein-2 (Fap2) of Fusobacterium nucleatum as a Vaccine Candidate for Therapeutic Intervention of Human Colorectal Cancer: An Immunoinformatics Approach
Source: MDPI journal article supplement (doi:10.3390/vaccines11030525), 2023-02-23

## Supplementary Material

**Table S1.** Analysis of thermodynamic ensemble prediction of secondary mRNA structures of vaccine candidates.

| mRNA Structure characterization | Vaccine 3       | Vaccine 4       |
|---------------------------------|-----------------|-----------------|
| Free energy                     | -24.49 kcal/mol | -21.39 kcal/mol |
| Frequency of MFE Structure      | 0.99%           | 0.14%           |
| Ensemble Diversity              | 55.13           | 51.91           |

**Figure S1.** Secondary structure of the multi-epitope-based vaccines showing coiled, helix, and strand regions.  
i. VACCINE-1, ii. VACCINE-2, iii. VACCINE-3, and iv. VACCINE-4.

### Amino acid sequence of secondary structure of different vaccine candidate

#### i. Vaccine 1

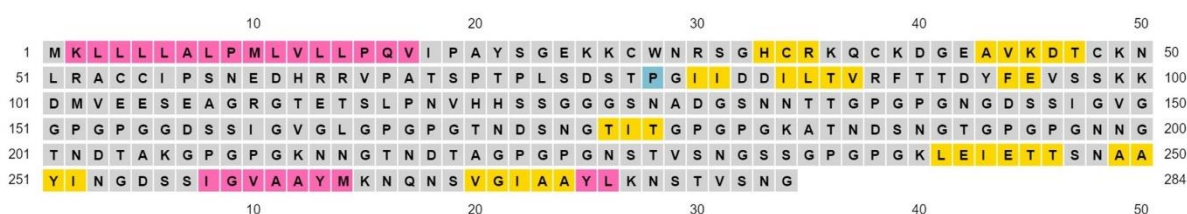

#### ii. Vaccine 2

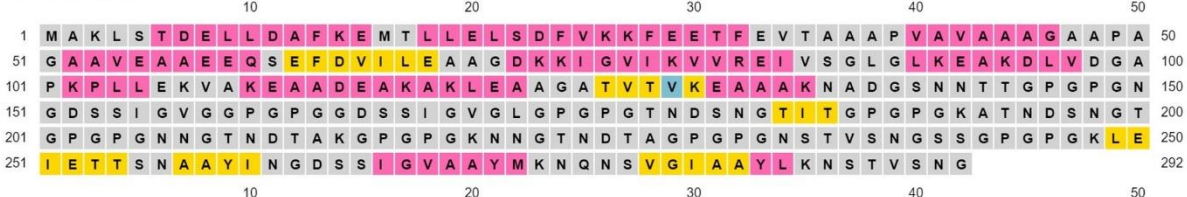

#### iii. Vaccine 3

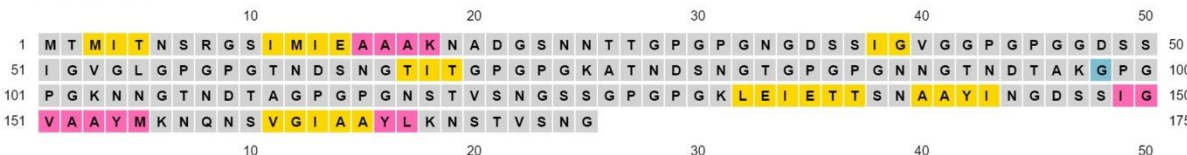

#### iv. Vaccine 4

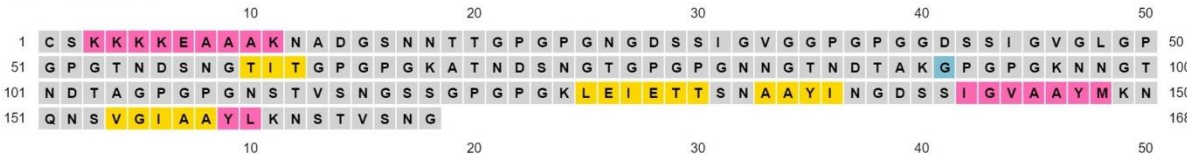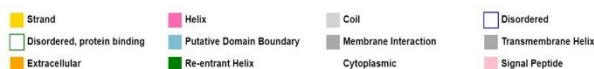

Supplement: s1 [file s1]
